# Supplementary material for: B Chromosomes in Free-Living Flatworms of the Genus Macrostomum (Platyhelminthes, Macrostomorpha)
Source: MDPI journal article supplement (doi:10.3390/ijms222413617), 2021-12-19
Supplement: s1 [file s1]

**Table S1:** Karyotypes of isolated replicates of *M. mirumnovem*

| ID   | Karyotype     | Large As | Small As | No. of Bs |
|------|---------------|----------|----------|-----------|
| S1   | 2n=9+6-7Bs    | 3        | 6        | 6-7       |
| S2   | 2n=9+6Bs      | 3        | 6        | 6         |
| S3   | 2n=8-9+4-6Bs  | 2-3      | 6        | 4-6       |
| S4   | 2n=10+6-7Bs   | 4        | 6        | 6-7       |
| S5   | 2n=10+5Bs     | 4        | 6        | 5         |
| S6   | 2n=8+7Bs      | 2        | 6        | 7         |
| S7   | 2n=9+3Bs      | 3        | 6        | 3         |
| S8   | 2n=9+7Bs      | 3        | 6        | 7         |
| S9   | 2n=10+6-7Bs   | 4        | 6        | 6-7       |
| S10* | 2n=9-10+1-2Bs | 3-4      | 6        | 1-2       |
| S11  | 2n=8+5-7Bs    | 2        | 6        | 5-7       |
| S12  | 2n=9-10+4Bs   | 3-4      | 6        | 4         |
| S13  | 2n=10+6Bs     | 4        | 6        | 6         |
| S14  | 2n=9-10+2Bs   | 3-4      | 6        | 2         |
| S15  | 2n=10+7BS     | 4        | 6        | 7         |
| S16  | -             | -        | -        | -         |
| S17  | 2n=10+9Bs     | 4        | 6        | 9         |
| S18  | 2n=8-10+4-6Bs | 2-4      | 6        | 4-6       |
| S19  | 2n=10+3-4Bs   | 4        | 6        | 3-4       |
| S20  | 2n=10+3Bs     | 4        | 6        | 3         |
| S21  | 2n=8-10+8-9Bs | 2-4      | 6        | 8-9       |
| S22  | 2n=9+4Bs      | 3        | 6        | 4         |
| S23  | 2n=9-10+7Bs   | 3-4      | 6        | 7         |
| S24  | 2n=9-10+6-8Bs | 3-4      | 6        | 6-8       |

\*self-fertilized worm (see Table S2)
