# Supplementary material for: B Chromosomes in Free-Living Flatworms of the Genus Macrostomum (Platyhelminthes, Macrostomorpha)
Source: MDPI journal article supplement (doi:10.3390/ijms222413617), 2021-12-19
Supplement: s1 [file s1]

**Table S2:** List of karyotype variants revealed among the F1 offspring from the self-fertilized worms of *M. mirumnovem*.

| ID worm | Karyotype      | A chromosomes |       | Bs  | Comments |
|---------|----------------|---------------|-------|-----|----------|
|         |                | large         | small |     |          |
| S10     | 2n=9-10+1-2Bs  | 3-4           | 6     | 1-2 |          |
| S10.1   | -              | -             | -     | -   | gone     |
| S10.2   | 2n=9-10+1-2Bs  | 3-4           | 6     | 1-2 |          |
| S10.3   | 2n=10-11+7-9Bs | 4-5           | 6     | 7-9 |          |
| S10.4   | 2n=10+1-2Bs    | 4             | 6     | 1-2 |          |
| S10.5   | 2n=10+0-1B     | 4             | 6     | 0-1 |          |
| S10.6   | 2n=10+2Bs      | 4             | 6     | 2   |          |
| S10.7   | 2n=10+3Bs      | 4             | 6     | 3   |          |
| S10.8   | -              | -             | -     | -   | died     |
| S10.9   | 2n=10+0-1B     | 4             | 6     | 0-1 |          |
| S10.10  | 2n=10+0-2Bs    | 4             | 6     | 0-2 |          |
| 3.8     | 2n=9-10+0-1B   | 3-4           | 6     | 0-1 |          |
| 3.8.1   | 2n=10+1B       | 4             | 6     | 1   |          |
| 3.8.2   | 2n=10+2Bs      | 4             | 6     | 2   |          |
| 3.8.3   | 2n=9-10+1-2Bs  | 3-4           | 6     | 1-2 |          |
| 12.15   | 2n=11+3-4Bs    | 5             | 6     | 3-4 |          |
| 12.15.1 | 2n=10+3-4Bs    | 4             | 6     | 3-4 |          |
| 12.15.2 | 2n=11+4Bs      | 5             | 6     | 4   |          |
| 12.15.3 | 2n=10+3Bs      | 4             | 6     | 3   |          |
| 12.15.4 | 2n=10+2Bs      | 4             | 6     | 2   |          |
| 12.15.5 | 2n=10+1B       | 4             | 6     | 1   |          |
| 12.15.6 | 2n=10+2Bs      | 4             | 6     | 2   |          |
| 12.15.7 | 2n=10+2-3Bs    | 4             | 6     | 2-3 |          |
| 12.15.8 | 2n=9-10+2-3Bs  | 3-4           | 6     | 2-3 |          |
| 12.21   | 2n=10-11+3-5BS | 4-5           | 6     | 3-5 |          |
| 12.21.1 | 2n=9-10+4-6Bs  | 3-4           | 6     | 4-6 |          |
| 12.21.2 | 2n=8-10+5Bs    | 3-4           | 5-6   | 5   |          |
| 12.21.3 | -              | -             | -     | -   | died     |
| 12.21.4 | 2n=10+5Bs      | 4             | 6     | 5   |          |
| 12.21.5 | 2n=11+3Bs      | 6             | 5     | 3   |          |
| 12.21.6 | 2n=9+3Bs       | 3             | 6     | 3   |          |
| 12.21.7 | 2n=9+4Bs       | 3             | 6     | 4   |          |
| 12.21.8 | 2n=9-10+3-5Bs  | 3-4           | 6     | 3-5 |          |
| 12.21.9 | 2n=10-11+4-5Bs | 4-5           | 6     | 4-5 |          |
